# Supplementary material for: Topological defects in cholesteric liquid crystals induced by monolayer domains with orientational chirality
Source: Royal Society of Chemistry journal article supplement (doi:10.1039/c4sm00872c), 2014-05-28
Supplement: c4sm00872c3.pdf [file c4sm00872c3.pdf]

SUPPLEMENTARY INFORMATION

## Topological defects in cholesteric liquid crystals induced by chiral molecular monolayer domains

Núria Petit-Garrido, Rahul Trivedi, Francesc Sagués, Jordi Ignés-Mullol, and Ivan I. Smalyukh

Two movies are included as supplementary information for the manuscript.

### Movie1.mov

Temperature ramp on a 8OCB:Cholesteryl-chloride mixture (1:1) viewed over a region that includes **single-arch twist-escaped disclinations**. The ramp is  $-0.1\text{ }^{\circ}\text{C}/\text{min}$  from the Compensation Temperature ( $47^{\circ}\text{C}$ ) down to  $40^{\circ}\text{C}$ . Final pitch  $p = -6.4\text{ }\mu\text{m}$ . The cell gap is  $15\text{ }\mu\text{m}$ . Video plays at roughly 250x real time. Window size is  $500\text{ }\mu\text{m}$ .

### Movie2.mov

Temperature ramp on a 8OCB:Cholesteryl-chloride mixture (1:1) viewed over a region that includes **double-arch singular disclinations**. The ramp is  $0.1\text{ }^{\circ}\text{C}/\text{min}$  from  $40^{\circ}\text{C}$  up to the Compensation Temperature ( $47^{\circ}\text{C}$ ). Initial pitch  $p = -6.4\text{ }\mu\text{m}$ . The cell gap is  $15\text{ }\mu\text{m}$ . Video plays at roughly 250x real time. Window size is  $200\text{ }\mu\text{m}$ .
